# Supplementary material
Source: publisher figshare collection journal article supplement (https://tandf.figshare.com/ndownloader/files/20773992)
Supplement: Supplementary file 1 [file 20773992]

Supplementary Material

**FDM printed pH-responsive capsules for the oral delivery of a model macromolecular dye**

Georgios K. Eleftheriadisa, Christos S. Katsiotisa, Nikolaos Bouropoulosb,c, Sotirios Koutsopoulosd, Dimitrios G. Fatourosa,*

aLaboratory of Pharmaceutical Technology, Department of Pharmacy, Aristotle University of Thessaloniki, 54124 Thessaloniki, Greece

bDepartment of Materials Science, University of Patras, 26504 Rio, Patras, Greece

cFoundation for Research and Technology Hellas, Institute of Chemical Engineering and High Temperature Chemical Processes, 26504 Patras, Greece

dCenter for Biomedical Engineering, Massachusetts Institute of Technology, 77 Massachusetts Avenue, Cambridge, Massachusetts, 02139, United States

*Corresponding author : Dr Dimitrios G. Fatouros

e-mail : dfatouro@pharm.auth.gr


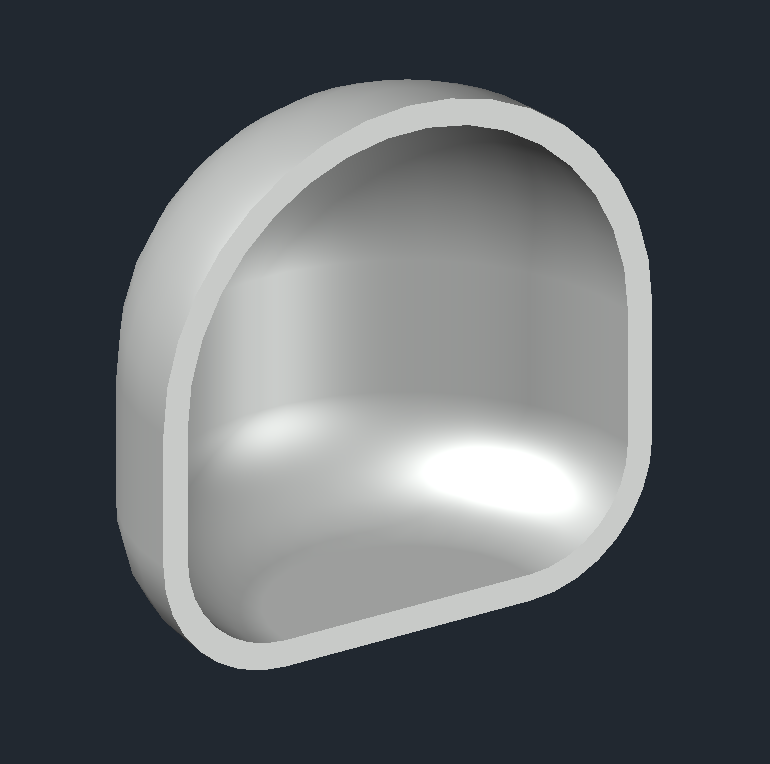


FIGURE S1. Preview of the internal hollow space of the desi
